# Supplementary material for: Exchange coupling and single molecule magnetism in redox-active tetraoxolene-bridged dilanthanide complexes
Source: PubMed Central journal article supplement — Chem Sci. 2017 Dec 8;9(5):1221–30. doi: 10.1039/c7sc04873d (PMC5885778; doi:10.1039/c7sc04873d), 2017-12-08
Supplement: SC-009-C7SC04873D-s001.pdf [file SC-009-C7SC04873D-s001.pdf]

Electronic Supplementary Information for:

## **Exchange Coupling and Single Molecule Magnetism in Redox-active Tetraoxolene-bridged Dilanthanide Complexes**

Peng Zhang,<sup>a</sup> Mauro Perfetti,<sup>a,b</sup> Michal Kern,<sup>a</sup> Philipp P. Hallmen,<sup>a</sup> Liviu Ungur,<sup>c</sup>  
Samuel Lenz,<sup>a</sup> Mark R. Ringenberg,<sup>d</sup> Wolfgang Frey,<sup>e</sup> Hermann Stoll,<sup>f</sup> Guntram  
Rauhut,<sup>f</sup> Joris van Slageren\*,<sup>a</sup>

<sup>a</sup> Institut für Physikalische Chemie, Universität Stuttgart, Pfaffenwaldring 55, D-70569, Stuttgart,  
Germany

<sup>b</sup> Department of Chemistry, University of Copenhagen, Universitetsparken 5, 2100 Copenhagen,  
Denmark

<sup>c</sup> Theory of Nanomaterials Group and INPAC-Institute of Nanoscale Physics and Chemistry, Katholieke,  
Universiteit Leuven, 3001 Leuven, Belgium

<sup>d</sup> Institut für Anorganische Chemie, Universität Stuttgart, Pfaffenwaldring 55, D-70569 Stuttgart,  
Germany

<sup>e</sup> Institut für Organische Chemie, Universität Stuttgart, Pfaffenwaldring 55, D-70569 Stuttgart,  
Germany

<sup>f</sup> Institut für Theoretische Chemie, Universität Stuttgart, Pfaffenwaldring 55, D-70569 Stuttgart,  
Germany

## Table of Contents

|                 |                                                                                                                                                                                                                                                    |            |
|-----------------|----------------------------------------------------------------------------------------------------------------------------------------------------------------------------------------------------------------------------------------------------|------------|
|                 | <i>Ab initio</i> calculations                                                                                                                                                                                                                      | <b>S4</b>  |
| <b>Fig. S1</b>  | Cyclic voltammogram of <b>1Tb</b> , <b>1Gd</b> and <b>1Y</b> in CH <sub>2</sub> Cl <sub>2</sub> /0.1 M Bu <sub>4</sub> NPF <sub>6</sub> measured at 295 K.                                                                                         | <b>S5</b>  |
| <b>Fig. S2</b>  | Cyclic voltammogram of <b>1Dy</b> in CH <sub>3</sub> CN (Left) and THF (Right) /0.1 M Bu <sub>4</sub> NPF <sub>6</sub> measured at 295 K.                                                                                                          | <b>S5</b>  |
| <b>Fig. S3</b>  | UV-vis electronic absorption spectra of compound <b>1Ln</b> (top) and <b>2Ln</b> (bottom) in CH <sub>3</sub> CN.                                                                                                                                   | <b>S5</b>  |
| <b>Fig. S4</b>  | ESI-MS spectra of compound <b>1Dy</b> in positive mode.                                                                                                                                                                                            | <b>S6</b>  |
| <b>Fig. S5</b>  | ESI-MS spectra of compound <b>2Dy</b> in negative mode.                                                                                                                                                                                            | <b>S7</b>  |
| <b>Fig. S6</b>  | ESI-MS spectra of compound <b>2Tb</b> in negative mode.                                                                                                                                                                                            | <b>S7</b>  |
| <b>Fig. S7</b>  | ESI-MS spectra of compound <b>2Gd</b> in negative mode.                                                                                                                                                                                            | <b>S8</b>  |
| <b>Fig. S8</b>  | ESI-MS spectra of compound <b>2Y</b> in negative mode.                                                                                                                                                                                             | <b>S9</b>  |
| <b>Fig. S9</b>  | IR spectra of compounds <b>1Ln</b> and <b>2Ln</b> .                                                                                                                                                                                                | <b>S9</b>  |
| <b>Fig. S10</b> | The fit of $\chi_M T$ vs $T$ plots for <b>2Gd</b> . The red line corresponds to the fit to a isotropic Hamiltonian only and blue line corresponds to the fit using parameters derived from HFEPR.                                                  | <b>S10</b> |
| <b>Fig. S11</b> | Field dependences of magnetization in the field range 0-70 kOe. Left, non-radical compounds; Right, radical compounds.                                                                                                                             | <b>S10</b> |
| <b>Fig. S12</b> | Frequency dependence of in-phase ac susceptibilities, which corresponds to Fig. 6a-e.                                                                                                                                                              | <b>S11</b> |
| <b>Fig. S13</b> | An example of the least-squares-fitting (Solid line) via the sum of two modified Debye functions (200 Oe) at 1.8 K for <b>2Dy</b> .                                                                                                                | <b>S12</b> |
| <b>Fig. S14</b> | Field dependence of relaxation time for compound <b>1Dy</b> and <b>2Dy</b> at 1.8 K.                                                                                                                                                               | <b>S12</b> |
| <b>Fig. S15</b> | $\ln(\tau)$ vs $\ln(T)$ plots for compound <b>1Dy</b> and <b>2Dy</b> in 1000 Oe. The red lines correspond to the fit of $\tau^{-1} \sim T^n$ .                                                                                                     | <b>S12</b> |
| <b>Fig. S16</b> | Frequency and temperature dependence of ac susceptibilities under 0 Oe dc field for <b>2Tb</b> .                                                                                                                                                   | <b>S13</b> |
| <b>Fig. S17</b> | Temperature dependence of ac susceptibility under 5000 Oe dc field for <b>2Y</b> , and plots of $\ln\tau$ versus $T^{-1}$ with the Arrhenius fit, and the comparison between dc susceptibility and $(\chi_T - \chi_S)$ value from ac measurements. | <b>S13</b> |
| <b>Fig. S18</b> | Hahn-echo decay of 1mM <b>2Y</b> in acetonitrile at 7 K, 35 GHz and 1249 mT fitted with a biexponential decay function.                                                                                                                            | <b>S14</b> |
| <b>Fig. S19</b> | The calculated orientation of the local $g_z$ axes of ground doublets on Dy <sup>III</sup> and Tb <sup>III</sup> ions for <b>1Dy</b> and <b>1Tb</b> .                                                                                              | <b>S14</b> |
| <b>Fig. S20</b> | HFEPR spectra of sample <b>Gd@1Y</b> recorded at 320 GHz and different temperatures.                                                                                                                                                               | <b>S14</b> |
| <b>Fig. S21</b> | HFEPR spectra of <b>1Gd</b> recorded at 5 K and various frequencies. The red lines correspond to simulations using spin Hamiltonian approach.                                                                                                      | <b>S15</b> |
| <b>Fig. S22</b> | The HFEPR comparison between <b>1Gd</b> and <b>2Gd</b> at 5K and 245 GHz, and spectra of sample <b>2Gd</b> recorded at 290 GHz and different temperatures.                                                                                         | <b>S15</b> |
| <b>Fig. S23</b> | HFEPR spectra of <b>2Gd</b> recorded at various frequencies. The red lines correspond to simulations using spin Hamiltonian approach.                                                                                                              | <b>S15</b> |

|                 |                                                                                                                                                                                                                                         |            |
|-----------------|-----------------------------------------------------------------------------------------------------------------------------------------------------------------------------------------------------------------------------------------|------------|
| <b>Fig. S24</b> | The fit of magnetization for <b>2Gd</b> . The blue line corresponds to the fit using parameters derived from HFEPR parameters.                                                                                                          | <b>S16</b> |
| <b>Fig. S25</b> | HFEPR spectra of <b>1Tb</b> recorded at 5 K and various frequencies, and frequency-field plots. The red line correspond to the linear fit.                                                                                              | <b>S16</b> |
| <b>Fig. S26</b> | Simulations of the HFEPR spectra of <b>2Tb</b> , using a model consisting of two effective spins $S = 1$ with $D$ values, isotropically exchange coupled to an $S = 1/2$ radical.                                                       | <b>S16</b> |
| <b>Table S1</b> | Crystallographic data and structure refinement details for compounds <b>1Ln</b>                                                                                                                                                         | <b>S17</b> |
| <b>Table S2</b> | Parameters obtained by least-squares-fitting via the sum of two modified Debye functions at different DC field and 1.8 K for <b>2Dy</b> .                                                                                               | <b>S17</b> |
| <b>Table S3</b> | Parameters of the biexponential fits of the Q-band relaxation measurements on <b>2Y</b>                                                                                                                                                 | <b>S18</b> |
| <b>Table S4</b> | Calculated energies (in $\text{cm}^{-1}$ ) for the 16 energy levels of the ${}^6H_{15/2}$ ground multiplet of $\text{Dy}^{\text{III}}$ in complexes <b>1Dy</b> , and projection of the total moment on quantization axis of every state | <b>S18</b> |
| <b>Table S5</b> | Calculated energies (in $\text{cm}^{-1}$ ) for the 13 energy levels of the ${}^7F_6$ ground multiplet of $\text{Tb}^{\text{III}}$ in complexes <b>1Tb</b> , and projection of the total moment on quantization axis of every state.     | <b>S19</b> |
| <b>Table S6</b> | Elemental Analysis for compounds <b>1Ln</b> and <b>2Ln</b> .                                                                                                                                                                            | <b>S19</b> |

### **Ab initio calculations**

Multi-configurational *ab initio* calculations were performed for **1Tb** and **1Dy**, replacing one of the two Tb<sup>3+</sup>/ Dy<sup>3+</sup> by diamagnetic Y<sup>3+</sup>. The calculations were carried out with the Molpro<sup>1,2</sup> suite of *ab initio* programs using the measured crystal structure. The (state-averaged) orbitals were obtained by employing the local density-fitted configuration-averaged Hartree-Fock (LDF-CAHF) method<sup>3,4</sup>. The active space included 8 electrons of Tb<sup>III</sup>/9 electrons of Dy<sup>III</sup> in seven 4f-type orbitals. The 28 electron pseudopotential/effective core potential (ECP) ECP28MWB<sup>5,6</sup> was used for Tb/Dy and Y. The basis set employed for Tb/Dy and Y was def2-TZVPP<sup>7</sup> and the auxiliary basis set for density fitting def2-TZVPP-JKFIT<sup>7</sup>. The elements O and N were described by the cc-pVTZ<sup>8-10</sup> basis set and the corresponding auxiliary basis set for these elements was cc-pVTZ-JKFIT<sup>11</sup>. For the remaining elements except of H, the cc-pVDZ<sup>8-10</sup> basis set and the corresponding cc-pVDZ-JKFIT<sup>11</sup> basis set for density fitting were used. The hydrogen atoms were described by a minimal basis (MINAO)<sup>12</sup> and the auxiliary basis set cc-pVDZ-JKFIT<sup>11</sup> was employed for density fitting. In the spin-orbit coupling step the ECP-SO operator corresponding to ECP28MWB was employed<sup>5</sup>. The orbitals resulting from the LDF-CAHF calculation are equivalent to the orbitals of a state-averaged CASSCF calculation averaging over all possible roots, i.e. 7 septets, 140 quintets, 588 triplets and 490 singlets for **1Tb** and 21 sextets, 224 quartets and 490 doublets for **1Dy**, taking into account the  $M_S$ -degeneracy of the corresponding spin-manifold by a weighting factor, i.e. a weighting factor of 7 for the septets, 5 for the quintets, 3 for the triplets and 1 for the singlets (**1Tb**) and moreover 3 for the sextets, 2 for the quartets and 1 for the doublets (**1Dy**). The state-averaged orbitals were used in a subsequent CASCI (complete active space configuration interaction) step to obtain the multi-configurational spin-free wave functions. In the following SO-coupling step, a limited number of roots was mixed, i. e., all septets (7), all quintets (140), 294 triplets and 292 singlets for **1Tb** and 21 sextets, 128 quartets and 130 doublets for **1Dy**, respectively. On the basis of the resulting spin-orbit multiplets, the  $g_z$ -value of the lowest pseudo-doublet and its direction for **1Tb** and the  $g$ -tensor for the ground Kramers doublet of **1Dy**, as well as the composition of the wave functions in terms of  $m_j$ -microstates for both compounds, were calculated using the SINGLE\_ANISO<sup>13</sup> program.

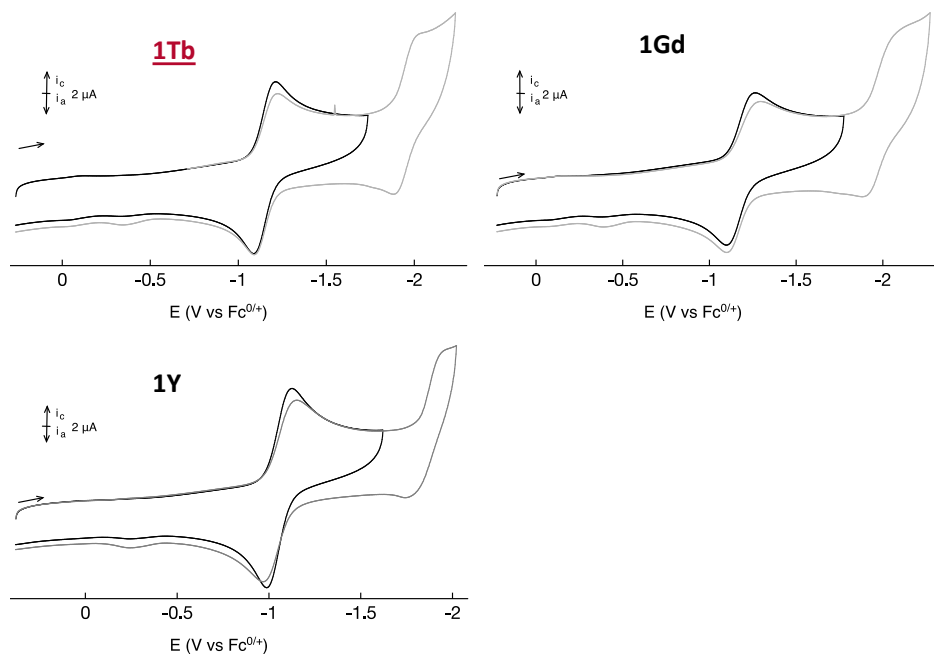

**Fig. S1.** Cyclic voltammogram of **1Tb**, **1Gd** and **1Y** in  $\text{CH}_2\text{Cl}_2/0.1 \text{ M Bu}_4\text{NPF}_6$  measured at 295 K.  $\text{Fc}^{0/+}$  = ferrocene/ferrocenium couple.

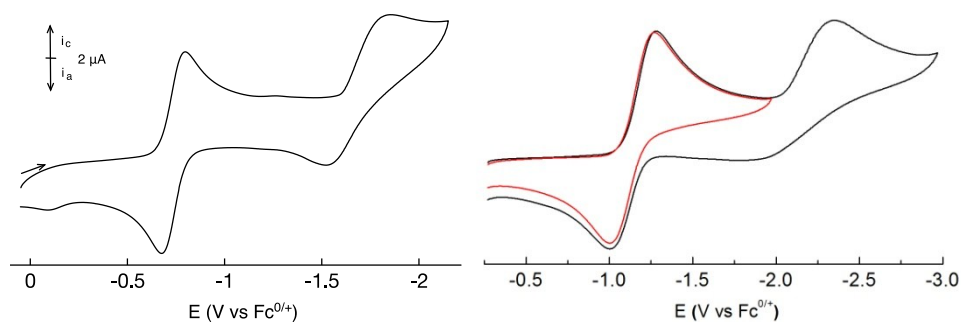

**Fig. S2.** Cyclic voltammogram of **1Dy** in  $\text{CH}_3\text{CN}$  (Left) and  $\text{THF}$  (Right) /  $0.1 \text{ M Bu}_4\text{NPF}_6$  measured at 295 K.  $\text{Fc}^{0/+}$  = ferrocene/ferrocenium couple.

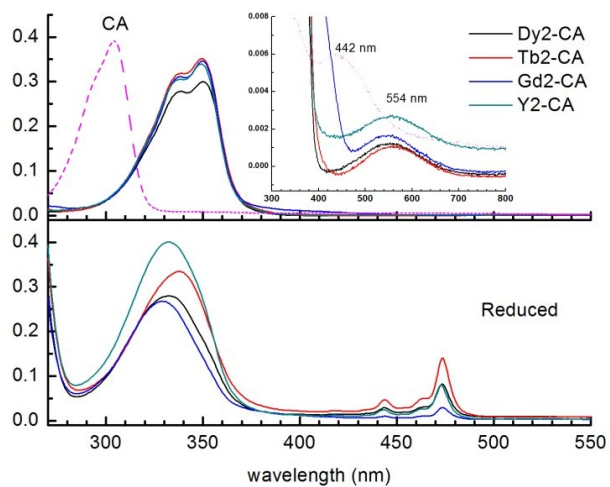

**Fig. S3.** UV-vis electronic absorption spectra of compound **1Ln** (top) and **2Ln** (bottom) in  $\text{CH}_3\text{CN}$ .

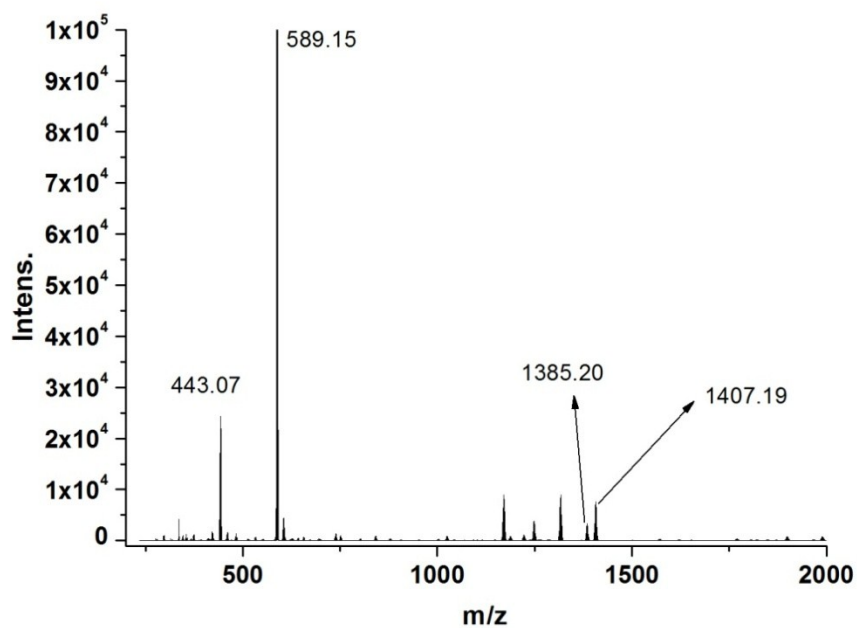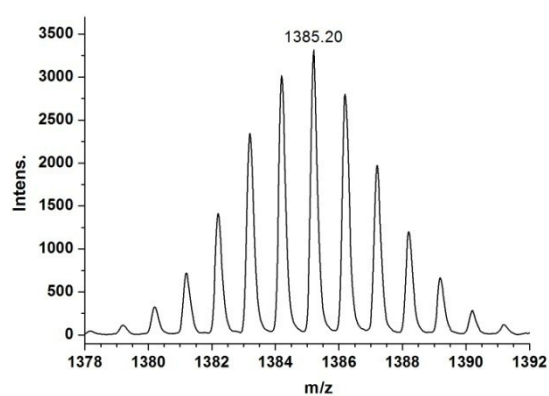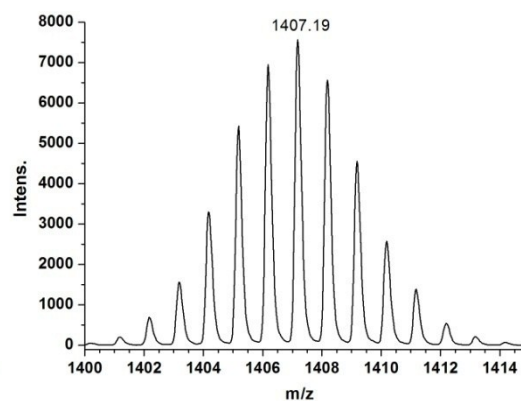

**Fig. S4.** ESI-MS spectra of compound **1Dy** in positive mode.  $m/z$  1385 and 1407 correspond to  $[M+H]^+$  and  $[M+Na]^+$ .

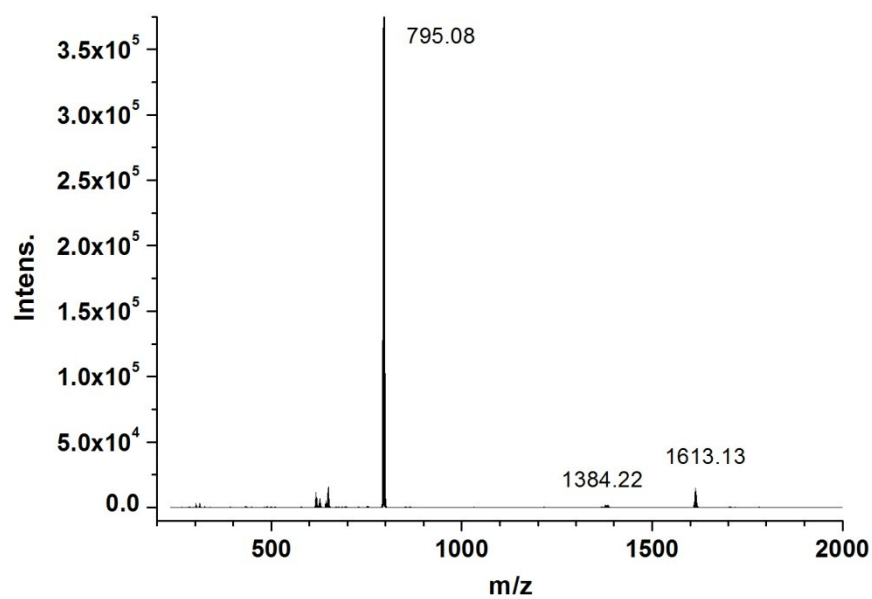

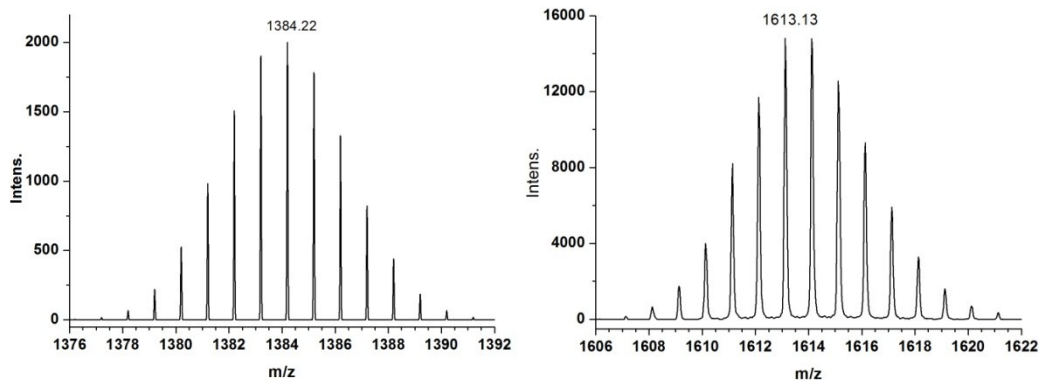

**Fig. S5.** ESI-MS spectra of compound **2Dy** in negative mode.  $m/z$  1384 and 1613 correspond to  $[M]^-$  and  $[M+2(\text{TFA})]^-$ . TFA = Trifluoroacetic acid

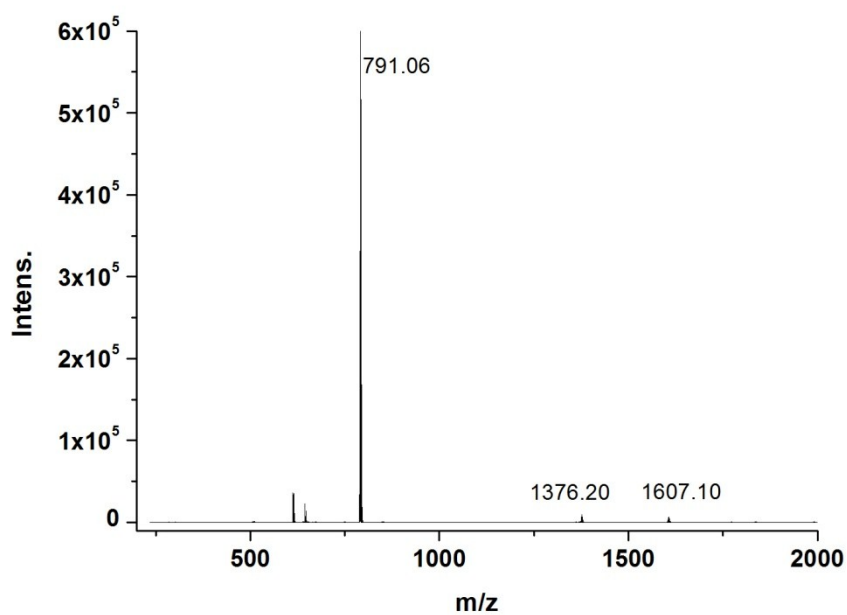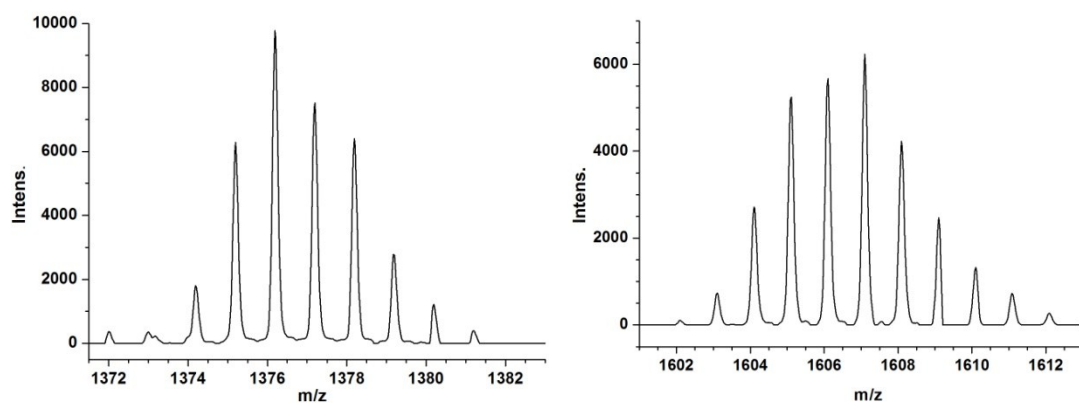

**Fig. S6.** ESI-MS spectra of compound **2Tb** in negative mode.  $m/z$  1376 and 1607 correspond to  $[M]^-$  and  $[M+2(\text{TFA})]^-$ . TFA = Trifluoroacetic acid

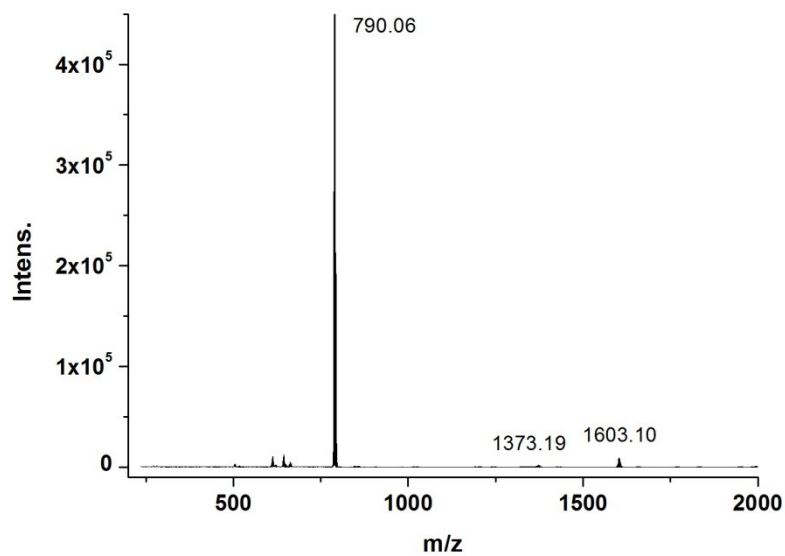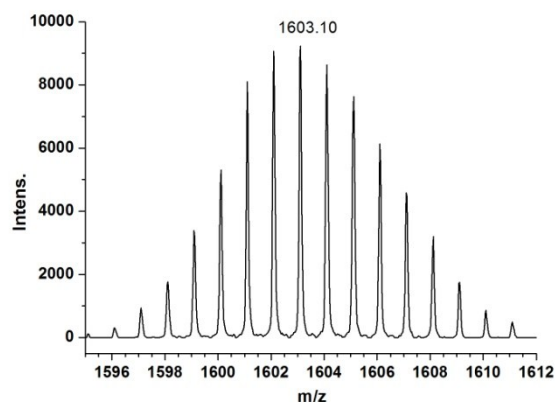

**Fig. S7.** ESI-MS spectra of compound **2Gd** in negative mode.  $m/z$  1603 corresponds to  $[M+2(\text{TFA})]$   
- TFA = Trifluoroacetic acid

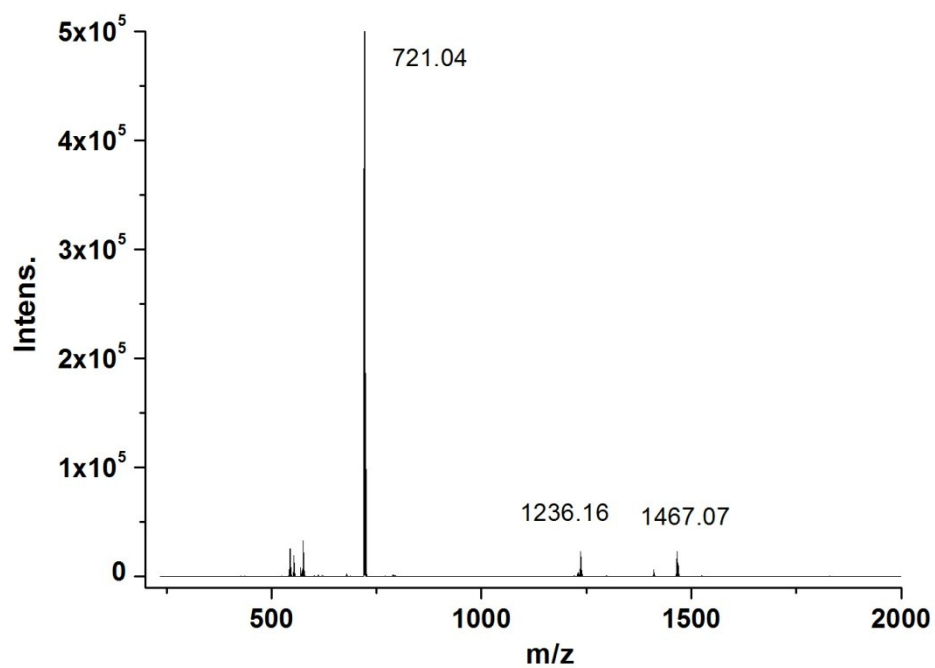



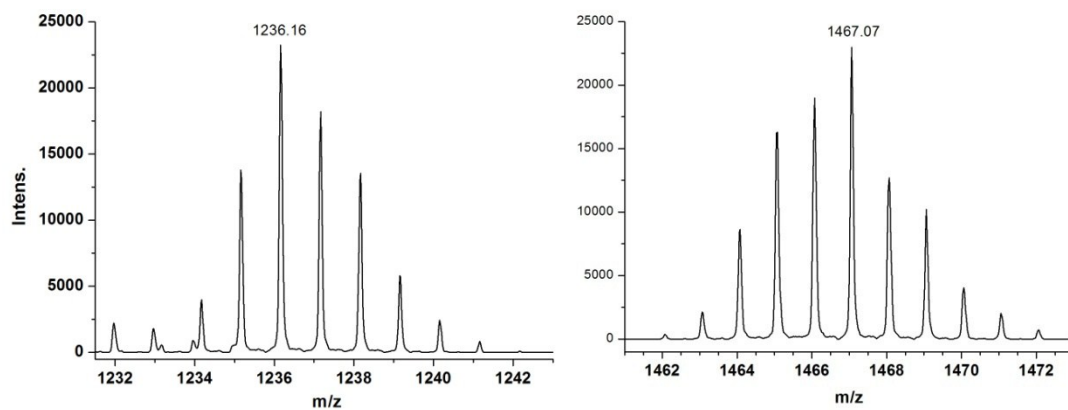

**Fig. S8.** ESI-MS spectra of compound **2Y** in negative mode.  $m/z$  1236 and 1467 correspond to  $[M]^-$  and  $[M+2(\text{TFA})]^-$ . TFA = Trifluoroacetic acid

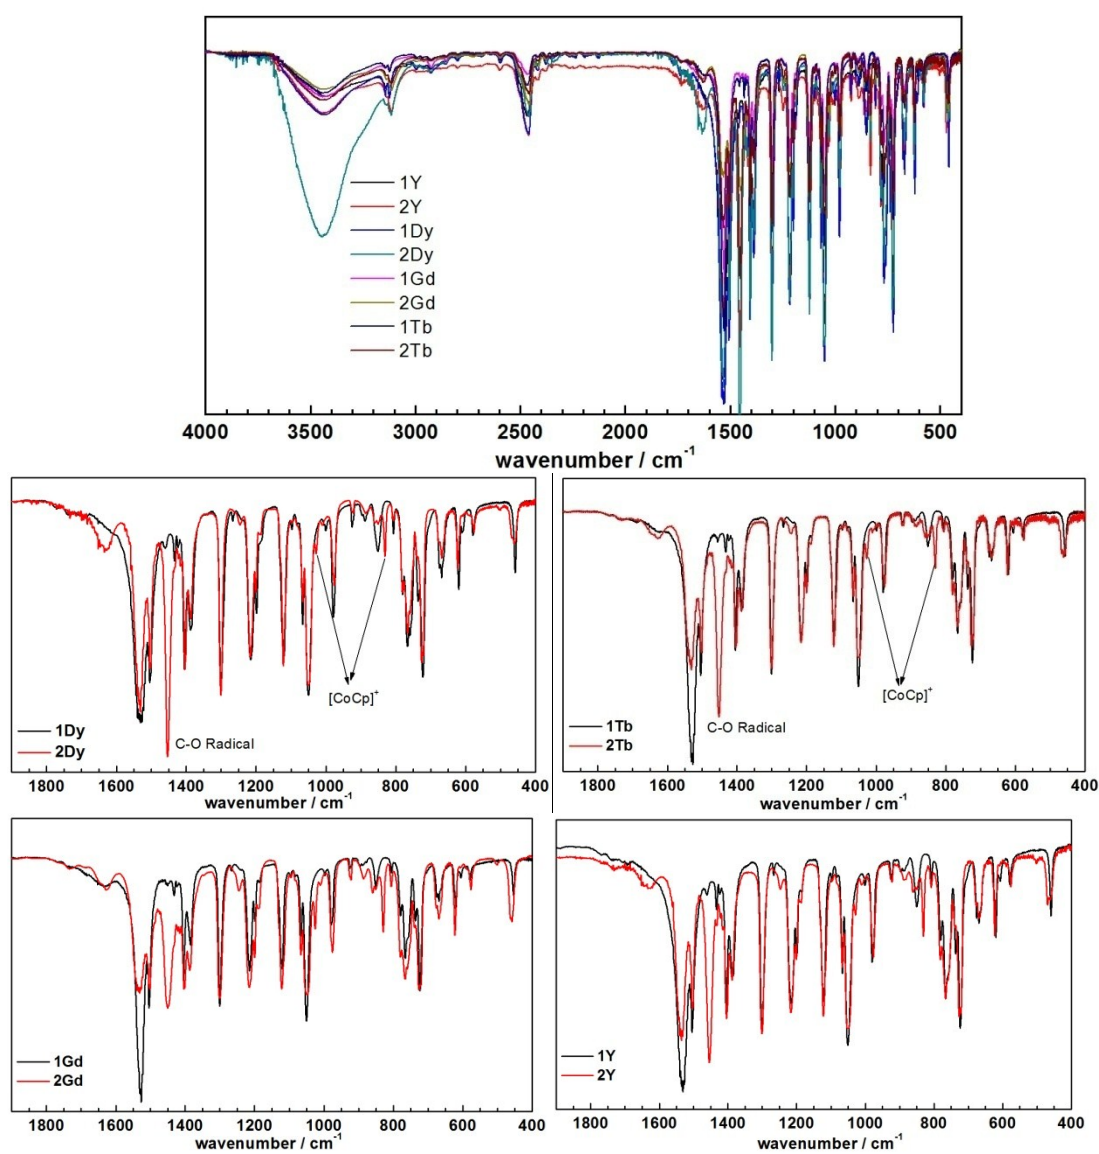

**Fig. S9.** IR spectra of compounds **1Ln** and **2Ln**.

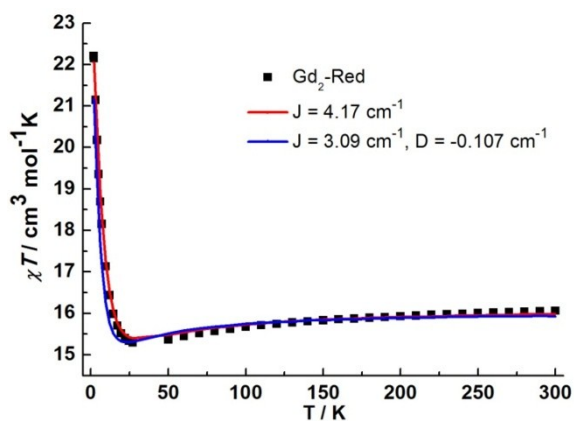

**Fig. S10.** The fit of  $\chi_M T$  vs  $T$  plots for **2Gd**. The red line corresponds to the fit to a isotropic Hamiltonian only and blue line corresponds to the fit using parameters derived from HFEPR.

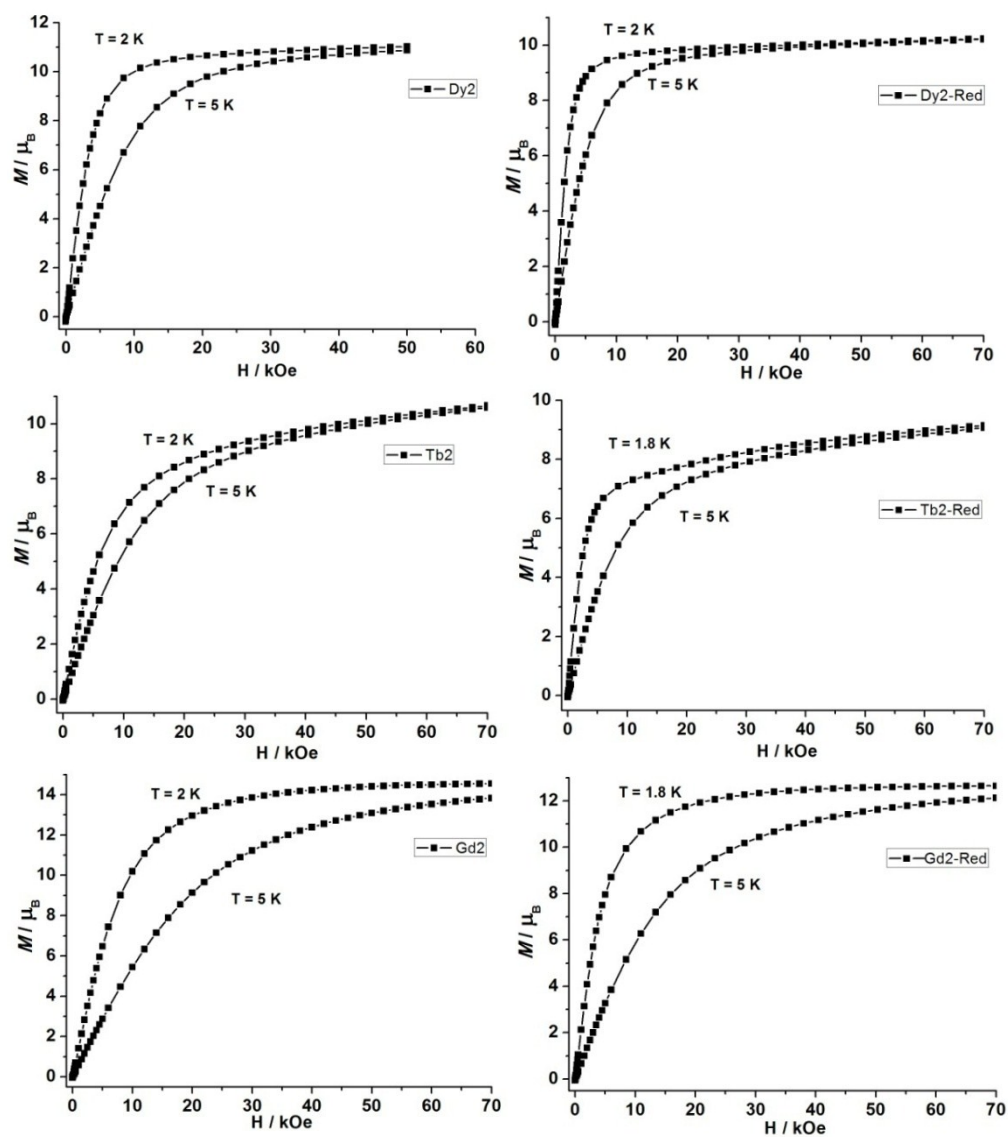

**Fig. S11.** Field dependences of magnetization in the field range 0-70 kOe. Left, non-radical compounds; Right, radical compounds.

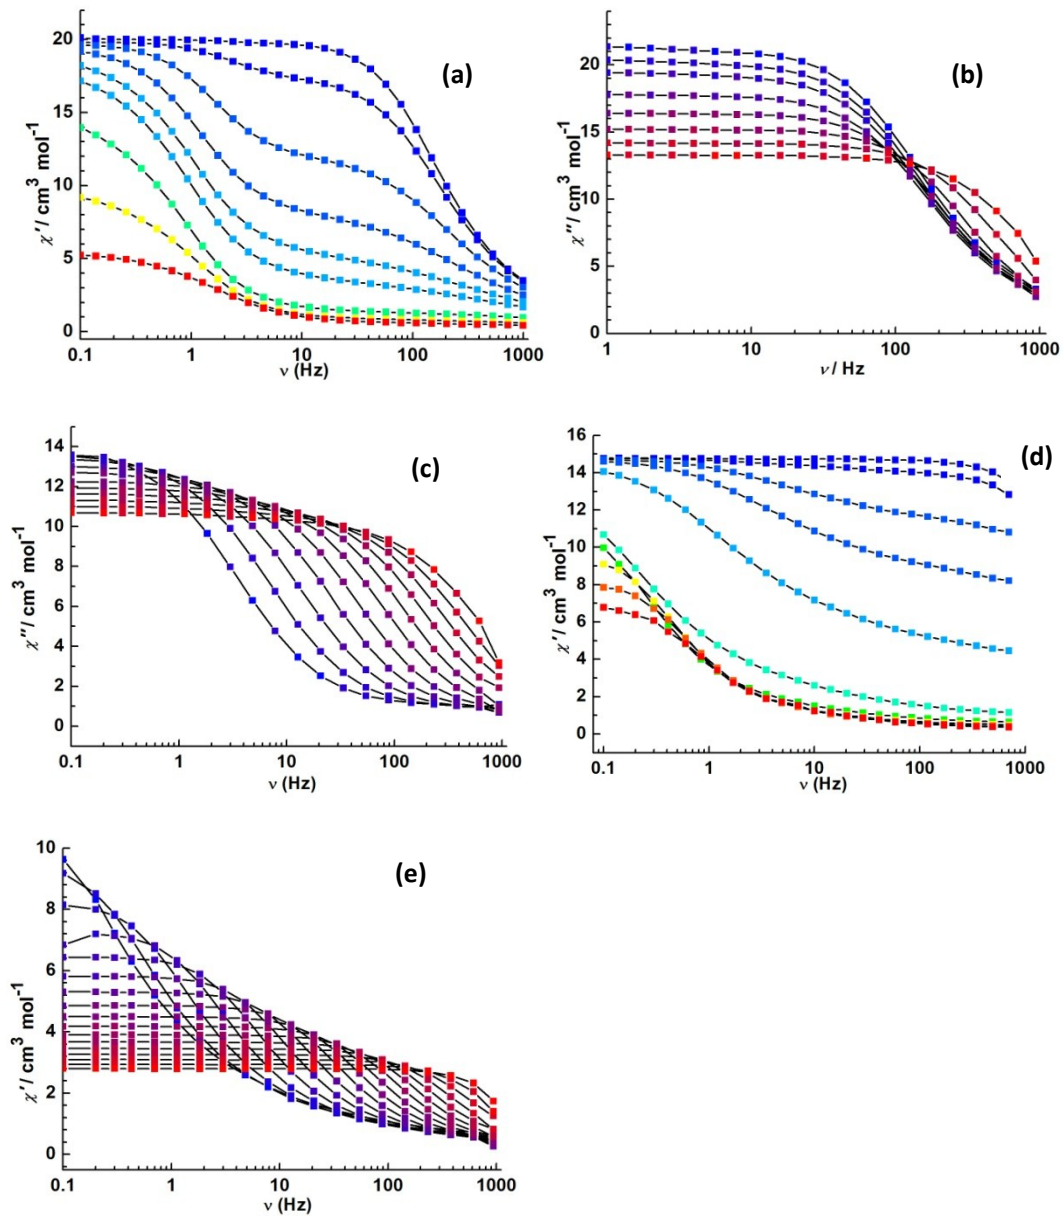

**Fig. S 12.** Frequency dependence of in-phase ac susceptibilities, which corresponds to Fig. 6a-e.

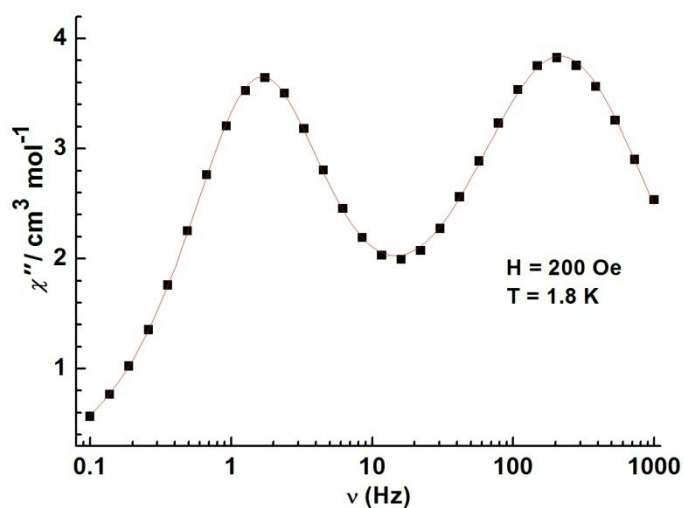

**Fig. S13.** An example of the least-squares-fitting (Solid line) via the sum of two modified Debye functions (200 Oe) at 1.8 K for **2Dy**.

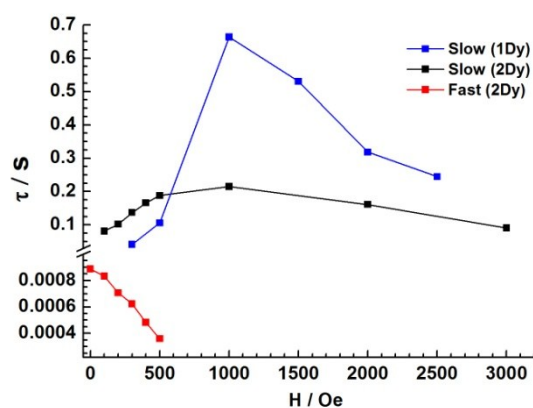

**Fig. S14.** Field dependence of relaxation time for compound **1Dy** and **2Dy** at 1.8 K.

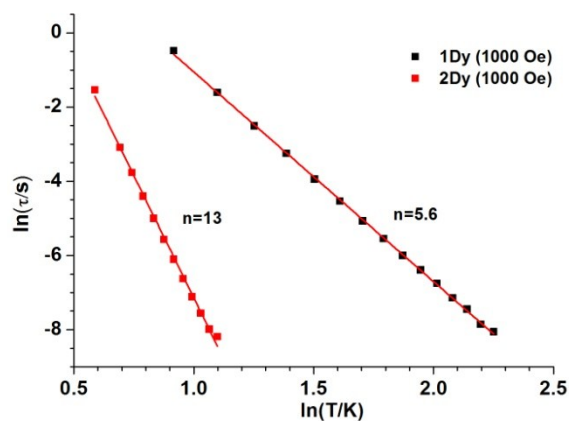

**Fig. S15.**  $\ln(\tau)$  vs  $\ln(T)$  plots for compound **1Dy** and **2Dy** in 1000 Oe. The red lines correspond to the fit of  $\tau^{-1} \sim T^n$ .

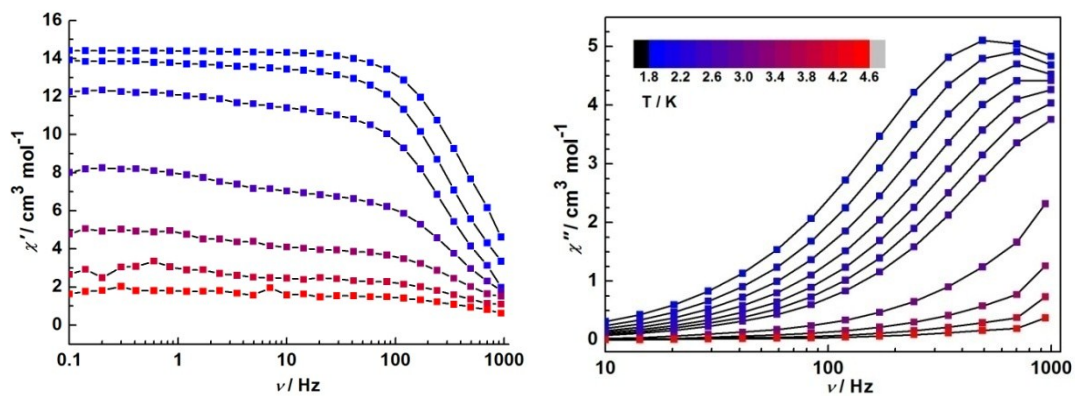

**Fig. S16.** Frequency and temperature dependence of ac susceptibilities under 0 Oe dc field for **2Tb**.

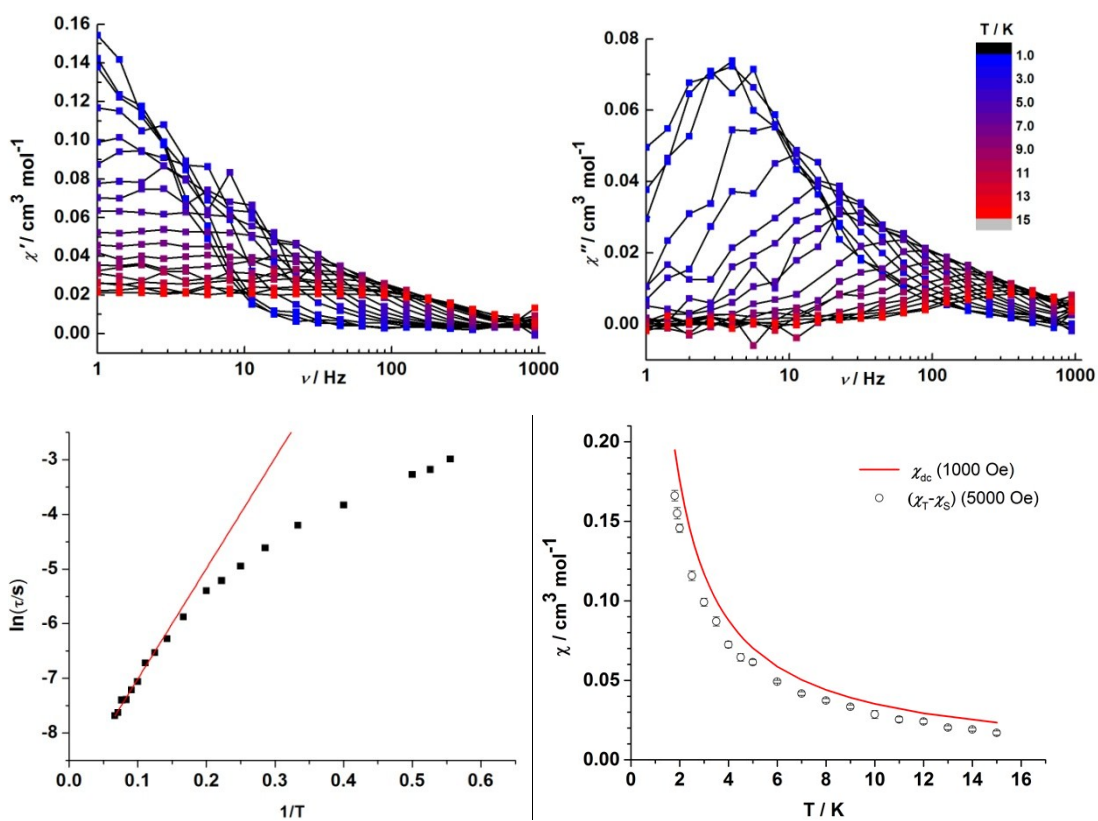

**Fig. S17.** Temperature dependence of ac susceptibility under 5000 Oe dc field for **2Y**, and plots of  $\ln(\nu s)$  versus  $T^{-1}$  with the Arrhenius fit, and the comparison between dc susceptibility and  $(\chi_T - \chi_S)$  value from ac measurements.

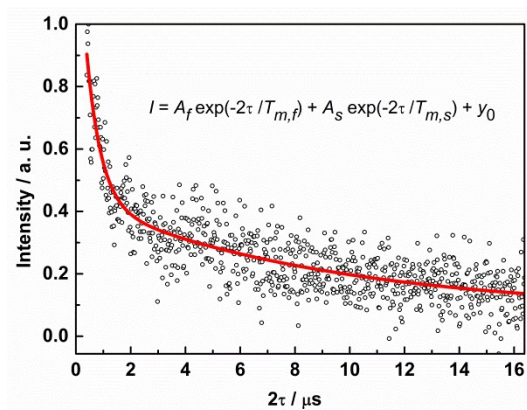

**Fig. S18.** Hahn-echo decay of 1mM **2Y** in acetonitrile at 7 K, 35 GHz and 1249 mT fitted with a biexponential decay function.

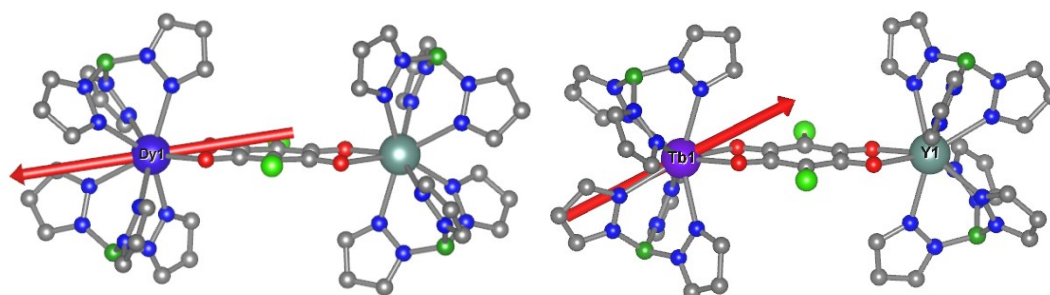

**Fig. S19.** The calculated orientation of the local  $g_z$  axes of ground doublets on Dy<sup>III</sup> and Tb<sup>III</sup> ions for **1Dy** and **1Tb**.

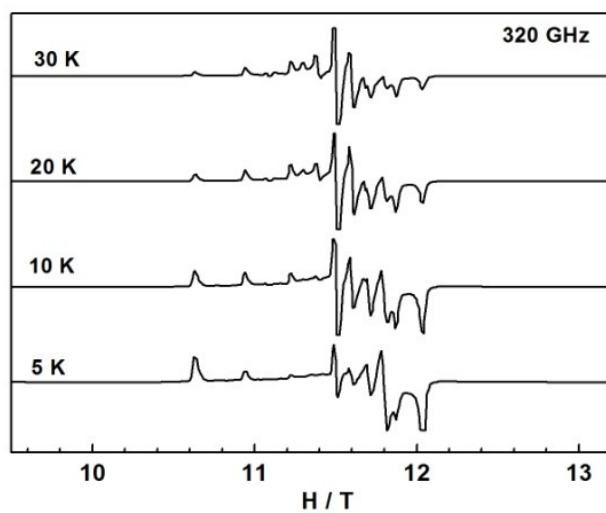

**Fig. S20.** HFEPR spectra of sample **Gd@1Y** recorded at 320 GHz and different temperatures.

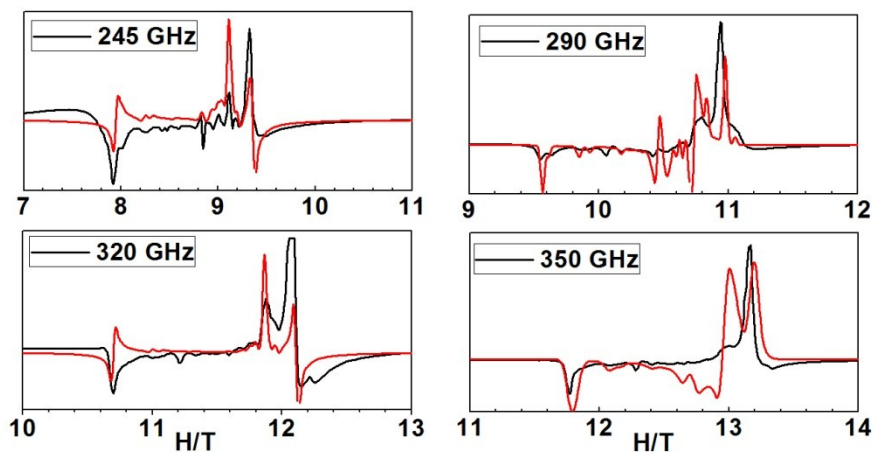

**Fig. S21.** HFEPR spectra of **1Gd** recorded at 5 K and various frequencies. The red lines correspond to simulations using spin Hamiltonian approach.

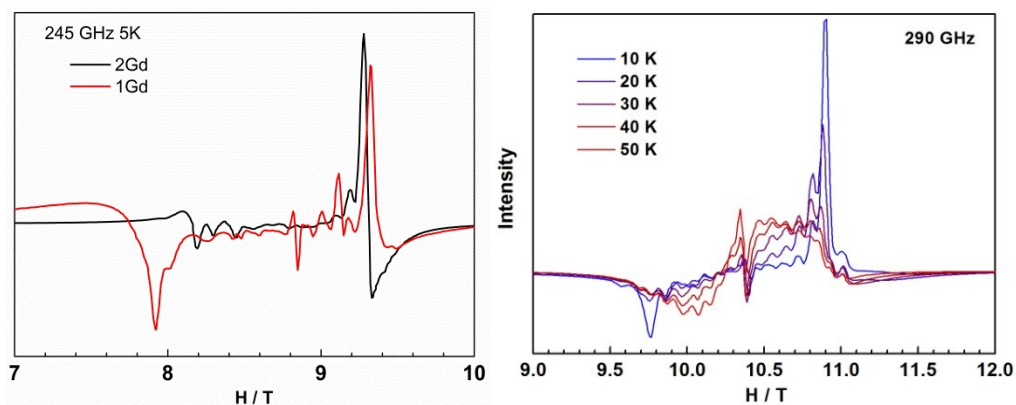

**Fig. S22.** The HFEPR comparison between **1Gd** and **2Gd** at 5K and 245 GHz, and spectra of sample **2Gd** recorded at 290 GHz and different temperatures.

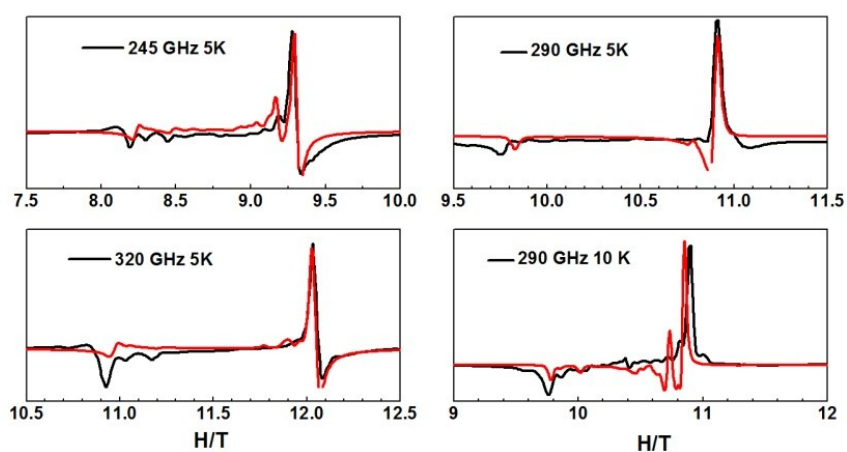

**Fig. S23.** HFEPR spectra of **2Gd** recorded at various frequencies. The red lines correspond to simulations using spin Hamiltonian approach.

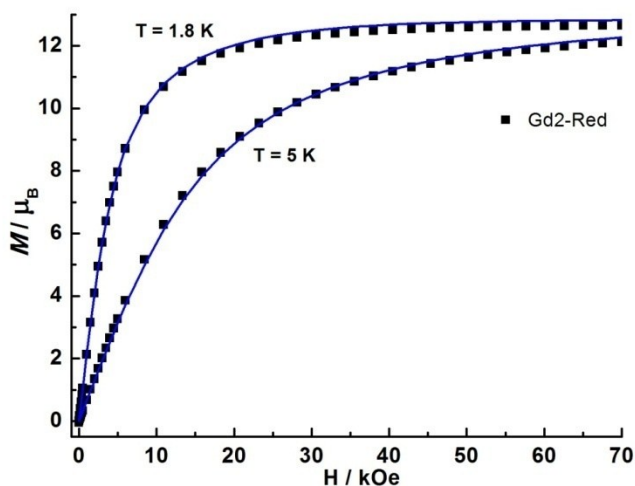

**Fig. S24.** The fit of magnetization for **2Gd**. The blue line corresponds to the fit using parameters derived from HFEPR parameters.

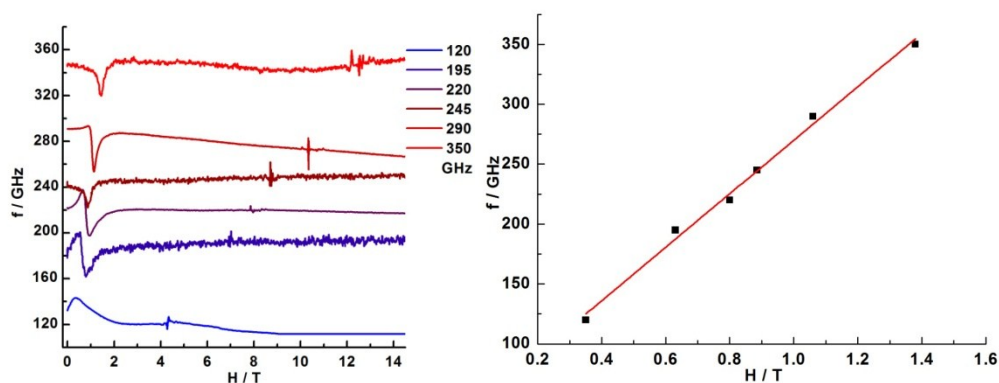

**Fig. S25.** HFEPR spectra of **1Tb** recorded at 5 K and various frequencies, and frequency-field plots. The red line correspond to the linear fit.

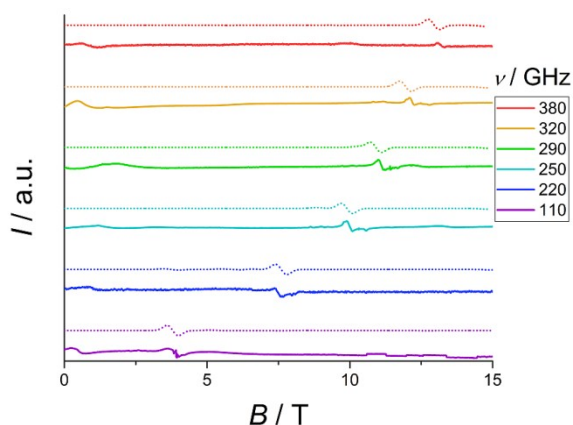

**Fig. S26.** Simulations of the HFEPR spectra of **2Tb**, using a model consisting of two effective spins  $S = 1$  with  $D$  values, isotropically exchange coupled to an  $S = 1/2$  radical.  $H = J\hat{S}_{\text{rad}}(\hat{S}_1 + \hat{S}_2) + \mu_B\hat{S} \cdot \mathbf{g} \cdot \hat{H} + \sum D\hat{S}_z^2$ , with  $S_{\text{rad}} = 1/2$ ,  $S_1 = S_2 = 1$ ,  $D = -2000 \text{ cm}^{-1}$ ,  $E = 1 \text{ cm}^{-1}$ ,  $g_{\text{rad}} = 2.07$ ,  $g_{\text{Tb}} = (0.1, 0.1, 4.0)$ ,  $J = 4.3 \text{ cm}^{-1}$ .



**Table S1.** Crystallographic data and structure refinement details for compounds **1Ln**

| Compound                                                    | <b>1Dy</b>                                                                                                       | <b>1Tb</b>                                                                                                       | <b>1Gd</b>                                                                                                       | <b>1Y</b>                                                                                                       |
|-------------------------------------------------------------|------------------------------------------------------------------------------------------------------------------|------------------------------------------------------------------------------------------------------------------|------------------------------------------------------------------------------------------------------------------|-----------------------------------------------------------------------------------------------------------------|
| Formula                                                     | Dy <sub>2</sub> C <sub>44</sub> N <sub>24</sub> O <sub>4</sub><br>B <sub>4</sub> Cl <sub>6</sub> H <sub>44</sub> | Tb <sub>2</sub> C <sub>44</sub> N <sub>24</sub> O <sub>4</sub><br>B <sub>4</sub> Cl <sub>6</sub> H <sub>44</sub> | Gd <sub>2</sub> C <sub>44</sub> N <sub>24</sub> O <sub>4</sub><br>B <sub>4</sub> Cl <sub>6</sub> H <sub>44</sub> | Y <sub>2</sub> C <sub>44</sub> N <sub>24</sub> O <sub>4</sub><br>B <sub>4</sub> Cl <sub>6</sub> H <sub>44</sub> |
| Mr                                                          | 1553.93                                                                                                          | 1546.79                                                                                                          | 1543.44                                                                                                          | 1406.75                                                                                                         |
| Crystal system                                              | Monoclinic                                                                                                       | Monoclinic                                                                                                       | Monoclinic                                                                                                       | Monoclinic                                                                                                      |
| Space group                                                 | <i>P</i> 2 <sub>1</sub> / <i>n</i>                                                                               | <i>P</i> 2 <sub>1</sub> / <i>n</i>                                                                               | <i>P</i> 2 <sub>1</sub> / <i>n</i>                                                                               | <i>P</i> 2 <sub>1</sub> / <i>n</i>                                                                              |
| <i>T</i> [K]                                                | 156(2)                                                                                                           | 156(2)                                                                                                           | 296(2)                                                                                                           | 156(2)                                                                                                          |
| <i>a</i> [Å]                                                | 13.9322                                                                                                          | 14.0030                                                                                                          | 14.1500                                                                                                          | 13.9374                                                                                                         |
| <i>b</i> [Å]                                                | 15.0142                                                                                                          | 15.0792                                                                                                          | 15.2250                                                                                                          | 15.0463                                                                                                         |
| <i>c</i> [Å]                                                | 14.8268                                                                                                          | 14.8247                                                                                                          | 14.9690                                                                                                          | 14.7862                                                                                                         |
| $\alpha$ [°]                                                | 90.000                                                                                                           | 90.000                                                                                                           | 90.000                                                                                                           | 90.000                                                                                                          |
| $\beta$ [°]                                                 | 107.692                                                                                                          | 107.593                                                                                                          | 107.750                                                                                                          | 107.464                                                                                                         |
| $\gamma$ [°]                                                | 90.000                                                                                                           | 90.000                                                                                                           | 90.000                                                                                                           | 90.000                                                                                                          |
| <i>V</i> [Å <sup>3</sup> ]                                  | 2954.79                                                                                                          | 2983.88                                                                                                          | 3071.31                                                                                                          | 2957.83                                                                                                         |
| <i>Z</i>                                                    | 2                                                                                                                | 2                                                                                                                | 2                                                                                                                | 2                                                                                                               |
| $\rho_{\text{calcd}}$ [g cm <sup>-3</sup> ]                 | 1.747                                                                                                            | 1.722                                                                                                            | 1.669                                                                                                            | 1.580                                                                                                           |
| $\mu(\text{Mo-K}\alpha)$ [mm <sup>-1</sup> ]                | 2.845                                                                                                            | 2.68                                                                                                             | 2.46                                                                                                             | 2.29                                                                                                            |
| <i>F</i> (000)                                              | 1524                                                                                                             | 1520                                                                                                             | 1516                                                                                                             | 1416                                                                                                            |
| Reflns collected                                            | 28184                                                                                                            | 28220                                                                                                            | 28997                                                                                                            | 26061                                                                                                           |
| Unique reflns                                               | 7240                                                                                                             | 7353                                                                                                             | 8275                                                                                                             | 6076                                                                                                            |
| <i>R</i> <sub>int</sub>                                     | 0.0779                                                                                                           | 0.0521                                                                                                           | 0.3682                                                                                                           | 0.0819                                                                                                          |
| Param/restraint                                             | 379 / 0                                                                                                          | 379 / 0                                                                                                          | 379 / 0                                                                                                          | 379 / 0                                                                                                         |
| GOF                                                         | 1.004                                                                                                            | 1.045                                                                                                            | 0.814                                                                                                            | 1.029                                                                                                           |
| <i>R</i> <sub>1</sub> [ <i>I</i> > 2 $\sigma$ ( <i>I</i> )] | 0.0399                                                                                                           | 0.0405                                                                                                           | 0.0933                                                                                                           | 0.0478                                                                                                          |
| <i>wR</i> <sub>2</sub> (all data)                           | 0.0753                                                                                                           | 0.1078                                                                                                           | 0.1463                                                                                                           | 0.1203                                                                                                          |

**Table S2.** Parameters obtained by least-squares-fitting via the sum of two modified Debye functions at different DC field and 1.8 K for **2Dy**.

| <i>H</i> /Oe | $\Delta\chi_1$ /<br>cm <sup>3</sup> mol <sup>-1</sup> | $\Delta\chi_2$ /<br>cm <sup>3</sup> mol <sup>-1</sup> | $\tau_1$ /s | $\alpha_1$ | $\tau_2$ /s | $\alpha_2$ |
|--------------|-------------------------------------------------------|-------------------------------------------------------|-------------|------------|-------------|------------|
| 0            | 18.17                                                 | 0                                                     | 8.87e-4     | 0.14       | 0           | 0          |
| 100          | 16.30                                                 | 2.02                                                  | 8.33e-4     | 0.19       | 0.08        | 0          |
| 200          | 11.02                                                 | 7.50                                                  | 7.06e-4     | 0.23       | 0.10        | 0.06       |
| 300          | 7.10                                                  | 11.46                                                 | 6.23e-4     | 0.29       | 0.14        | 0.12       |
| 400          | 4.10                                                  | 14.00                                                 | 4.83e-4     | 0.30       | 0.17        | 0.17       |
| 500          | 2.27                                                  | 15.08                                                 | 3.60e-4     | 0.25       | 0.19        | 0.19       |
| 1000         | 0                                                     | 14.07                                                 | 0           | 0          | 0.22        | 0.18       |

|      |   |      |   |   |      |      |
|------|---|------|---|---|------|------|
| 2000 | 0 | 8.91 | 0 | 0 | 0.16 | 0.17 |
| 3000 | 0 | 4.69 | 0 | 0 | 0.09 | 0.17 |

**Table S3.** Parameters of the biexponential fits of the Q-band relaxation measurements on **2Y**

| Inversion Recovery |                |                     |                  |                     |
|--------------------|----------------|---------------------|------------------|---------------------|
| Temperature / K    | $A_f$          | $T_{1,f}$ / ms      | $A_s$            | $T_{1,s}$ / ms      |
| 7                  | $-1.3 \pm 0.1$ | $0.06 \pm 0.01$     | $-0.65 \pm 0.04$ | $0.9 \pm 0.1$       |
| Hahn-echo decay    |                |                     |                  |                     |
| Temperature / K    | $A_f$          | $T_{m,f}$ / $\mu$ s | $A_s$            | $T_{m,s}$ / $\mu$ s |
| 7                  | $1.0 \pm 0.1$  | $0.5 \pm 0.1$       | $0.36 \pm 0.01$  | $9 \pm 2$           |

**Table S4.** Calculated energies (in  $\text{cm}^{-1}$ ) for the 16 energy levels of the  ${}^6H_{15/2}$  ground multiplet of  $\text{Dy}^{\text{III}}$  in complexes **1Dy**, and projection of the total moment on quantization axis of every state.

|    | Energy / $\text{cm}^{-1}$ | Projection of the total moment on quantization axis                                                                                                                                  |
|----|---------------------------|--------------------------------------------------------------------------------------------------------------------------------------------------------------------------------------|
| 1  | 0.000                     | 80.8% -15/2>+0% -13/2>+0.6% -11/2>+0.7% -9/2>+0.3% -7/2>+0.1% -5/2>+0% -3/2>+0.1% -1/2>+17% 15/2 >+0% 13/2>+0.1% 11/2>+0.1% 9/2>+0.1% 7/2>+0% 5/2>+0% 3/2 >+0% 1/2>                  |
| 2  | 4.99E-6                   | 17% -15/2 >+0% -13/2>+0.1% -11/2>+0.1% -9/2>+0.1% -7/2>+0% -5/2>+0% -3/2>+0% -1/2>+80.8% 15/2>+0% 13/2>+0.6% 11/2>+0.7% 9/2>+0.3% 7/2>+0.1% 5/2>+0% 3/2>+0.1% 1/2>                   |
| 3  | 84.497                    | 0.1% -15/2>+16% -13/2>+5.4% -11/2>+1.4% -9/2>+1.1% -7/2>+0.2% -5/2>+0.1% -3/2>+2.0% -1/2>+0.2% 15/2 >+44.5% 13/2>+17.9% 11/2>+4.2% 9/2>+3.9% 7/2>+0.9% 5/2>+1.7% 3/2 >+0.5% 1/2>     |
| 4  | 84.497                    | 0.2% -15/2>+44.5% -13/2>+17.9% -11/2>+4.2% -9/2>+3.9% -7/2>+0.9% -5/2>+1.7% -3/2>+0.5% -1/2>+0.1% 15/2>+16% 13/2>+5.4% 11/2>+1.4% 9/2>+1.1% 7/2>+0.2% 5/2>+0.1% 3/2>+2.0% 1/2>       |
| 5  | 122.856                   | 0.1% -15/2>+0.6% -13/2>+1.1% -11/2>+6.8% -9/2>+0.7% -7/2>+0.1% -5/2>+5.5% -3/2>+4.1% -1/2>+0.5% 15/2 >+23% 13/2>+14% 11/2>+20.9% 9/2>+2.7% 7/2>+13.8% 5/2>+0.8% 3/2 >+5.1% 1/2>      |
| 6  | 122.856                   | 0.5% -15/2>+23% -13/2>+14% -11/2>+20.9% -9/2>+2.7% -7/2>+13.8% -5/2>+0.8% -3/2 >+5.1% -1/2>+0.1% 15/2>+0.6% 13/2>+1.1% 11/2>+6.8% 9/2>+0.7% 7/2>+0.1% 5/2>+5.5% 3/2>+4.1% 1/2>       |
| 7  | 142.044                   | 0.3% -15/2>+4.2% -13/2>+9.6% -11/2>+9.8% -9/2>+2.1% -7/2>+4.4% -5/2>+10.5% -3/2>+8.1% -1/2>+0.3% 15/2 >+1.6% 13/2>+14.8% 11/2>+0.7% 9/2>+18.8% 7/2>+3.5% 5/2>+8.9% 3/2 >+2.5% 1/2>   |
| 8  | 142.0447                  | 0.3% -15/2>+1.6% -13/2>+14.8% -11/2>+0.7% -9/2>+18.8% -7/2>+3.5% -5/2>+8.9% -3/2>+2.5% -1/2>+0.3% 15/2>+4.2% 13/2>+9.6% 11/2>+9.8% 9/2>+2.1% 7/2>+4.4% 5/2>+10.5% 3/2>+8.1% 1/2>     |
| 9  | 172.307                   | 0.1% -15/2>+0.9% -13/2>+3.4% -11/2>+15.7% -9/2>+1.4% -7/2>+2.5% -5/2>+10.4% -3/2>+9.1% -1/2>+0.1% 15/2 >+0.3% 13/2>+6.1% 11/2>+0.4% 9/2>+15.5% 7/2>+10.8% 5/2>+3.0% 3/2 >+20.1% 1/2> |
| 10 | 172.307                   | 0.1% -15/2>+0.3% -13/2>+6.1% -11/2>+0.4% -9/2>+15.5% -7/2>+10.8% -5/2>+3.0% -3/2>+20.1% -1/2>+0.1% 15/2>+0.9% 13/2>+3.4% 11/2>+15.7% 9/2>+1.4% 7/2>+2.5% 5/2>+10.4% 3/2>+9.1% 1/2>   |
| 11 | 221.7549                  | 0.1% -15/2>+3.5% -13/2>+0.4% -11/2>+5.6% -9/2>+15.3% -7/2>+17.3% -5/2>+13.5% -3/2>+0.2% -1/2>+0.1% 15/2 >+3.5% 13/2>+2.6% 11/2>+4.2% 9/2>+14.4% 7/2>+15.2% 5/2>+3.9% 3/2 >+2.9% 1/2> |
| 12 | 221.7549                  | 0.1% -15/2 >+3.5% -13/2>+2.6% -11/2>+4.2% -9/2>+14.4% -7/2>+15.2% -5/2>+3.9% -3/2 >+2.9% -1/2>+0.1% 15/2>+3.5% 13/2>+0.4% 11/2>+5.6% 9/2>+15.3% 7/2>+17.3% 5/2>+13.5% 3/2>+0.2% 1/2> |
| 13 | 259.231                   | 0% -15/2>+4.6% -13/2>+22.9% -11/2>+26.3% -9/2>+15.3% -7/2>+12.1% -5/2>+9.7% -3/2>+2.7% -1/2>+0.0% 15/2>+0.1% 13/2>+0.1% 11/2>+0.1% 9/2>+0.7% 7/2>+1.8% 5/2>+1.5% 3/2 >+1.9% 1/2>     |
| 14 | 259.231                   | 0.0% -15/2 >+0.1% -13/2>+0.1% -11/2>+0.1% -9/2>+0.7% -7/2>+1.8% -5/2>+1.5% -3/2 >+1.9% -1/2>+0.0% 15/2>+4.6% 13/2>+22.9% 11/2>+26.3% 9/2>+15.3% 7/2>+12.1% 5/2>+9.7% 3/2>+2.7% 1/2>  |

|    |         |                                                                                                                                                                                   |
|----|---------|-----------------------------------------------------------------------------------------------------------------------------------------------------------------------------------|
| 15 | 498.047 | 0.0% -15/2>+0.1% -13/2>+0.4% -11/2>+1.5% -9/2>+3.8% -7/2>+7.3% -5/2>+17.6% -3/2>+15.3% -1/2>+0.0% 15/2>+0.1% 13/2>+0.5% 11/2>+1.5% 9/2>+3.9% 7/2>+9.9% 5/2>+12.8% 3/2>+25.3% 1/2> |
| 16 | 498.047 | 0.0% -15/2>+0.1% -13/2>+0.5% -11/2>+1.5% -9/2>+3.9% -7/2>+9.9% -5/2>+12.8% -3/2>+25.3% -1/2>+0.0% 15/2>+0.1% 13/2>+0.4% 11/2>+1.5% 9/2>+3.8% 7/2>+7.3% 5/2>+17.6% 3/2>+15.3% 1/2> |

**Table S5.** Calculated energies (in  $\text{cm}^{-1}$ ) for the 13 energy levels of the  ${}^7F_6$  ground multiplet of  $\text{Tb}^{\text{III}}$  in complexes **1Tb**, and projection of the total moment on quantization axis of every state.

|    | Energy / $\text{cm}^{-1}$ | Projection of the total moment on quantization axis                                                                     |
|----|---------------------------|-------------------------------------------------------------------------------------------------------------------------|
| 1  | 0                         | 45.3% -6>+2.7% -4>+0.2% -3>+1.3% -2>+0.1% -1>+0.8% 0>+<br>45.3% 6>+2.7% 4>+0.2% 3>+1.3% 2>+0.1% 1>                      |
| 2  | 2.523                     | 47.9% -6>+1.7% -4>+0.1% -3>+0.3% -2><br>47.9% 6>+1.7% 4>+0.1% 3>+0.3% 2>                                                |
| 3  | 52.964                    | 0.2% -6>+22.9% -5>+1.5% -4>+12.6% -3>+1.3% -2>+11% -1>+0.9% 0>+<br>0.2% 6>+22.9% 5>+1.5% 4>+12.6% 3>+1.3% 2>+11% 1>     |
| 4  | 70.954                    | 2.4% -6>+19% -5>+8.8% -4>+4.7% -3>+8.8% -2>+1.3% -1>+9.9% 0>+<br>2.4% 6>+19% 5>+8.8% 4>+4.7% 3>+8.8% 2>+1.3% 1>         |
| 5  | 107.486                   | 2.0% -6>+25.4% -5>+7.9% -4>+1.0% -3>+8.1% -2>+0.7% -1>+9.8% 0>+<br>2.0% 6>+25.4% 5>+7.9% 4>+1.0% 3>+8.1% 2>+0.7% 1>     |
| 6  | 158.533                   | 1.0% -6>+22.2% -5>+12.6% -4>+4.5% -3>+2.2% -2>+7.3% -1>+0.5% 0>+<br>1.0% 6>+22.2% 5>+12.6% 4>+4.5% 3>+2.2% 2>+7.3% 1>   |
| 7  | 183.415                   | 0.9% -6>+4.2% -5>+28.7% -4>+5.1% -3>+2.8% -2>+8.1% -1>+0.4% 0>+<br>0.9% 6>+4.2% 5>+28.7% 4>+5.1% 3>+2.8% 2>+8.1% 1>     |
| 8  | 256.733                   | 0.1% -6>+1.3% -5>+22.4% -4>+10.8% -3>+15.1% -2>+0.2% -1>+0.2% 0>+<br>0.1% 6>+1.3% 5>+22.4% 4>+10.8% 3>+15.1% 2>+0.2% 1> |
| 9  | 261.982                   | 0.1% -6>+3.1% -5>+4.5% -4>+32.9% -3>+7.8% -2>+1.2% -1>+0.9% 0>+<br>0.1% 6>+3.1% 5>+4.5% 4>+32.9% 3>+7.8% 2>+1.2% 1>     |
| 10 | 373.724                   | 0.1% -6>+0.1% -5>+3.3% -4>+1.5% -3>+12.5% -2>+11.4% -1>+42.3% 0>+<br>0.1% 6>+0.1% 5>+3.3% 4>+1.5% 3>+12.5% 2>+11.4% 1>  |
| 11 | 374.728                   | 0.9% -5>+0.4% -4>+6.3% -3>+5.2% -2>+29.6% -1>+15.3% 0>+<br>0.9% 5>+0.4% 4>+6.3% 3>+5.2% 2>+29.6% 1>                     |
| 12 | 412.974                   | 0.6% -5>+0.8% -4>+18.1% -3>+3.5% -2>+26.4% -1>+1.2% 0>+<br>0.6% 5>+0.8% 4>+18.1% 3>+3.5% 2>+26.4% 1>                    |
| 13 | 413.965                   | 0.3% -5>+4.8% -4>+2.1% -3>+31.1% -2>+2.8% -1>+17.7% 0>+<br>0.3% 5>+4.8% 4>+2.1% 3>+31.1% 2>+2.8% 1>                     |

**Table S6.** Elemental Analysis for compounds **1Ln** and **2Ln**.

| Samples    | C (%) |       | H (%) |      | N (%) |       |
|------------|-------|-------|-------|------|-------|-------|
|            | Found | Calc  | Found | Calc | Found | Calc  |
| <b>1Dy</b> | 34.75 | 34.01 | 2.871 | 2.85 | 22.22 | 21.63 |
| <b>2Dy</b> | 38.95 | 39.7  | 3.211 | 3.20 | 20.1  | 21.36 |
| <b>1Tb</b> | 33.55 | 34.16 | 2.99  | 2.87 | 21.69 | 21.73 |
| <b>2Tb</b> | 39.29 | 39.88 | 3.169 | 3.22 | 20.25 | 21.46 |

|            |       |       |       |      |       |       |
|------------|-------|-------|-------|------|-------|-------|
| <b>1Gd</b> | 35.08 | 34.24 | 2.942 | 2.87 | 22.86 | 21.78 |
| <b>2Gd</b> | 39.55 | 39.97 | 3.248 | 3.22 | 21.06 | 21.51 |
| <b>1Y</b>  | 38.50 | 37.57 | 3.314 | 3.15 | 24.70 | 23.90 |
| <b>2Y</b>  | 43.35 | 43.8  | 3.571 | 3.53 | 22.93 | 23.57 |

## Reference

- <sup>1</sup> H.-J. Werner, P. J. Knowles, G. Knizia, F. R. Manby, and M. Schütz, *WIREs Comput. Mol. Sci.* **2**, 242 (2012).
- <sup>2</sup> H.J. Werner, P.J. Knowles, G. Knizia, F.R. Manby, M. Schütz, P. Celani, W. Györffy, D. Kats, T. Korona, R. Lindh, A. Mitrushchenkov, G. Rauhut, K.R. Shamasundar, T.B. Adler, R.D. Amos, A. Bernhardsson, A. Berning, D.L. Cooper, M.J. O. Deegan, A.J. Dobbyn, F. Eckert, E. Goll, C. Hampel, A. Hesselmann, G. Hetzer, T. Hrenar, G. Jansen, C. Köppl, Y. Liu, A.W. Lloyd, R.A. Mata, A.J. May, S.J. McNicholas, W. Meyer, M.E. Mura, A. Nicklass, D.P. O’Neill, P. Palmieri, D. Peng, K. Pflüger, R. Pitzer, M. Reiher, T. Shiozaki, H. Stoll, A.J. Stone, R. Tarroni, T. Thorsteinsson, and M. Wang, *MOLPRO, version 2015.1, a package of ab initio programs* (2015, see [www.molpro.net](http://www.molpro.net)).
- <sup>3</sup> C. Köppl and H.-J. Werner, *J. Chem. Theory. Comput.* **12**, 3122 (2016).
- <sup>4</sup> P. P. Hallmen, C. Köppl, G. Rauhut, H. Stoll, and J. van Slageren, *J. Chem. Phys.* **147**, 164101 (2017).
- <sup>5</sup> M. Dolg, H. Stoll, and H. Preuss, *J. Chem. Phys.* **90**, 1730 (1989).
- <sup>6</sup> D. Andrae, U. Häußermann, M. Dolg, H. Stoll, and H. Preuß, *Theoret. Chim. Acta* **77**, 123 (1990).
- <sup>7</sup> R. Gulde, P. Pollak, and F. Weigend, *J. Chem. Theory. Comput.* **8**, 4062 (2012).
- <sup>8</sup> A. K. Wilson, D. E. Woon, K. A. Peterson, and T. H. Dunning, *J. Chem. Phys.* **110**, 7667 (1999).
- <sup>9</sup> D. E. Woon and T. H. Dunning, *J. Chem. Phys.* **98**, 1358 (1993).
- <sup>10</sup> D. E. Woon and T. H. Dunning, *J. Chem. Phys.* **100**, 2975 (1994).
- <sup>11</sup> F. Weigend, *Phys. Chem. Chem. Phys.* **4**, 4285 (2002).
- <sup>12</sup> G. Knizia, *J. Chem. Theory. Comput.* **9**, 4834 (2013).
- <sup>13</sup> L. F. Chibotaru and L. Ungur, *J. Chem. Phys.* **137**, 64112 (2012).
